# Supplementary material for: The effects of graded levels of calorie restriction: VI. Impact of short-term graded calorie restriction on transcriptomic responses of the hypothalamic hunger and circadian signaling pathways
Source: publisher site journal article supplement (doi:10.18632/aging.100895), 2016-02-23

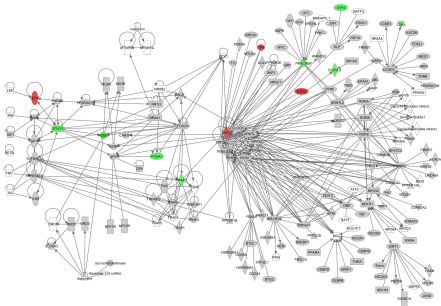

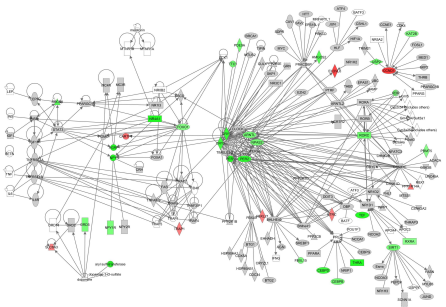

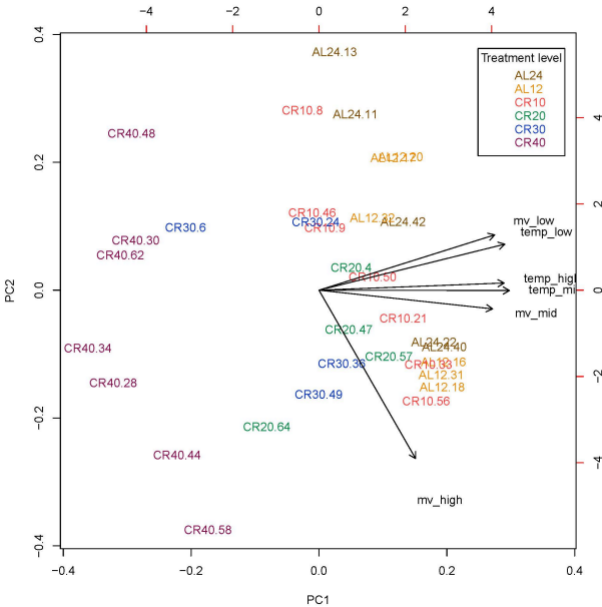

Treatment level

24AL  
12AL  
10CR  
20CR  
30CR  
40CR

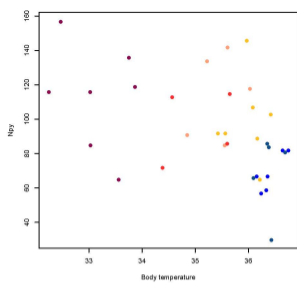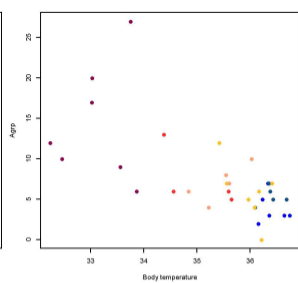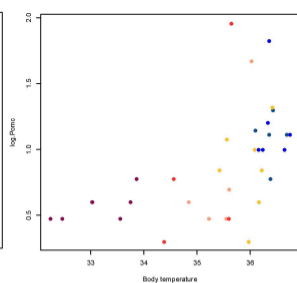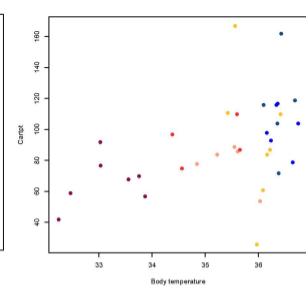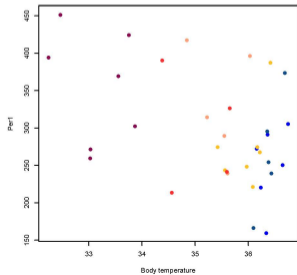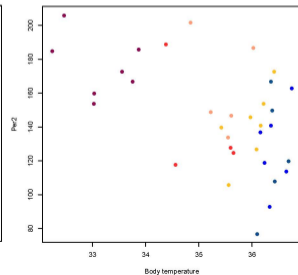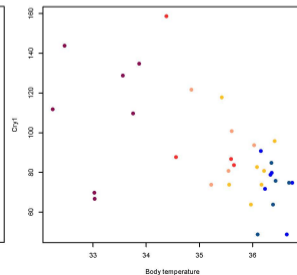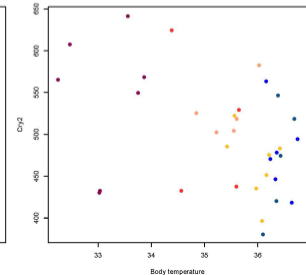

Supplement: Supplementary file [file aging-v8i4-100895-supplementary-material-SD4.pdf]
